# Supplementary material for: Retinal vessel density from optical coherence tomography angiography to differentiate early glaucoma, pre-perimetric glaucoma and normal eyes
Source: PLoS One. 2017 Feb 2;12(2):e0170476. doi: 10.1371/journal.pone.0170476 (PMC5289421; doi:10.1371/journal.pone.0170476)
Supplement: S1 Table — (XLSX) [file pone.0170476.s001.xlsx]

## Sheet: POAG
POAG patients	IOP	Antigloucoma drops	VF mean deviation (dB)	VF Patern standart deviation OD (dB)	VFI	C/D	Mean RNFL (μm)	Sup RNFL (μm)	Temp RNFL (μm)	Nasal RNFL (μm)	Inf RNFL (μm)	Peripapillary area vessel density	Optic nerve head vessel density	Ppapillary area vessel density	Superior papillary area vessel density	Inferior papillary area vessel density
POAG patient 1	11	2	-1.11	3.36	97	0.8	67	74	45	59	89	77.9	66.7	76.3	69	89.1		(MİLD )
POAG patient 2	11	2	-1.26	2.46	96	0.8	67	92	44	55	78	77.2	68.8	78.3	72.4	89.8
POAG patient 3	13	2	-2.05	6.22	92	0.75	77	86	72	70	79	82.8	64.7	82.8	81	84.2		(SEVERE)
POAG patient 4	13	2	-4.33	8.3	95	0.8	72	87	59	68	72	79.6	63.2	81.7	78.6	88.3
POAG patient 4	16	2	1.22	1.3	100	0.3	83	109	56	67	99	86.8	82.1	84.8	85.4	85.7
POAG patient 5	16	1	-1.15	1.34	99	0.7	90	91	95	70	105	72	68.5	74.6	73.5	81.3
POAG patient 6	5	2	-4.1	2.68	96	0.4	69	75	70	46	83	72.5	61.3	79.5	70.7	77.2	(sup rnfl slight decrease)
POAG patient 7	7	2	-3.32	2.3	94	0.3	69	82	66	50	77	78.6	64.5	78.9	82.4	92.2
POAG patient 8	19	1	-4	2.4	94	0.6	71	64	51	58	109	82.3	60.7	84.2	86.3	85.5
POAG patient 9	11	2	-1.68	2.77	96	0.7	73	84	47	58	104	81.6	65.9	81.6	78.6	79.5	sup rnfl defect
POAG patient 10	9	3	-0.08	1.76	99	0.65	87	101	88	55	105	85	77	81.2	90.3	83.2	inf rnfl defect
POAG patient 11	9	3	-10.23	13.11	70	0.8	79	74	81	63	97	82.3	71	79.6	77.5	82.3	sup rnfl thinning
POAG patient 12	10	2	-7.86	11.29	70	0.7	80	112	70	70	84	83.7	72	84.1	86.5	90
POAG patient 13	10	2	-8.25	7.99	77	0.7	95	116	63	71	129	90.3	73.4	88.2	84.7	83.4
POAG patient 14	12	2	-10.55	14.21	49	0.4	68	81	54	75	64	75.2	68	72.3	75.4	82.1
POAG patient 15	10	2	-11.74	12.76	61	0.5	62	66	49	73	60	73.7	69.2	71.5	70.7	90.5
POAG patient 16	13	3	0.11	1.91	95	0.8	72	81	72	65	90	78.6	66.2	76.5	75.6	71.9
POAG patient 17	12	3	-2.02	2.9	99	0.9	81	102	78	66	80	82.5	68.5	79.4	80.4	72.8
POAG patient 18	9	2	-4.76	2.14	97	0.8	95	132	81	77	91	85.2	50	77.6	86.7	78.7
POAG patient 19	12	2	-4.73	1.73	91	0.8	85	80	77	77	108	74.4	69.9	80.2	84.2	76.5
POAG patient 20	6	1	-1.5	3.07	93	0.7	75	86	56	72	88	86.5	71.4	76.2	69.1	75.2
POAG patient 21	5	1	-2.4	5.17	96	0.7	72	84	51	61	92	82.4	69.7	78.6	77.3	74.3
POAG patient 22	11	1	-1.5	2.12	97	0.5	69	85	55	69	67	74.3	68.3	72.7	73.8	78.3
POAG patient 23	9	1	-1.35	1.78	94	0.6	70	101	51	60	66	75.9	65.7	76.8	74.3	79.4
																		70.5
																		78.3

## Sheet: control
control	IOP	VF mean deviation (dB)	VF Patern standart deviation OD (dB)	VFI	Mean RNFL (μm)	Sup RNFL (μm)	Temp RNFL (μm)	Nasal RNFL (μm)	Inf RNFL (μm)	Outside optic nerve	Optic nerve head vessel density	Peripapiller vessel density	Sup peripapiller vessel density	Inf peripapiller vessel density
control 1	9	-0.08	1.76	99	102	101	88	75	105	85	77	81.2	90.3	90
control 2	9	1.35	1.52	70	92	74	81	63	97	82.3	71	89.6	87.5	83.4
control 3	10	0.82	0.9	70	96	112	70	70	84	83.7	72	84.1	86.5	82.1
control 4	10	1.35	1.52	77	99	116	63	71	129	90.3	73.4	88.2	84.7	90.5
control 5	12	-0.52	1.9	49	97	81	84	75	84	75.2	68	92.3	95.4	91.9
control 6	10	0.82	3.29	61	96	86	79	73	90	73.7	89.2	91.5	90.7	92.8
control 7	13	0.11	1.91	95	84	81	72	65	90	90.7	80.1	87.8	90.4	90
control 8	12	-2.02	2.9	99	106	92	78	86	118	95.7	90.7	93.7	94.8	93.5
control 9	9	1.35	1.52	97	96	132	81	77	91	97.2	86.3	95.8	93.7	96.3
control 10	12	0.82	1.29	91	102	80	77	77	108	96.7	91.8	89	91.7	88.4
control 11	6	-1.5	3.07	93	85	86	86	72	88	85.7	93.4	89	94	87.7
control 12	5	-2.4	3.17	96	93	84	81	91	96	94.2	81.8	94.7	96.3	88.7
control 13	11	-1.5	2.12	97	79	85	75	89	87	88.2	88	90.3	91	89
control 14	9	-1.35	1.78	94	98	101	81	70	86	88	80.6	90.8	94.6	93.4
control 15	12	1.35	1.2	96	86	88	76	72	89	91.3	85.6	93.6	95.4	91.3
control 16	11	0.82	1.29	97	84	82	88	78	94	92.6	87.6	92.7	92.5	91.3

## Sheet: Suspects
Suspects	IOP	md	psd	VFI	C/D	Mean RNFL (μm)	Sup RNFL (μm)	Temp RNFL (μm)	Nasal RNFL (μm)	Inf RNFL (μm)	Outside the optic nerve vessel density	Optic nerve head vessel density	Peripapiller vessel density	Sup peripapiller vessell density	Inf peripapiller vessel density
Suspect 1	20	-4.95	-5.56	95	0.5	82	88	71	63	105	91	76.2	87.4	82.5	88.8
Suspect 2	21	3.5	5.96	91	0.5	67	79	56	57	78	84.5	76.5	83.4	81.2	84.9
Suspect 3	13	1.28	1.72	99	0.6	103	130	65	75	143	87.4	75.3	75.8	81.7	73.3
Suspect 4	13	0.48	1.87	100	0.5	100	129	63	78	130	86.7	72.5	81.8	79.8	83.2
Suspect 5	19	-1.46	1.4	100	0.4	82	80	60	70	119	78.4	91	87.1	81.6	91.3
Suspect 6	17	-1.13	1.16	100	0.5	78	102	44	78	88	90.2	75	72	85.5	87.2
Suspect 7	15	-1.2	1.74	99	0.5	74	98	44	71	83	95	71	82.6	80.2	92.4
Suspect 8	12	-0.54	1.65	99	0.7	102	121	77	77	135	75	84	85.3	87.2	82.1
Suspect 9	15	-0.68	1.76	98	0.7	92	114	61	71	121	75.4	85.3	80.4	84.5	79.8
Suspect 10	19	-0.15	1.7	99	0.6	96	102	71	73	138	86	79.7	80	83	78
Suspect 11	19	1.26	1.63	99	0.7	99	113	83	67	132	90.3	84.1	90.2	92	84.5
Suspect 12	18	-1.2	1.3	97	0.4	70	88	39	60	92	92.4	78.5	84.8	81.6	87.1
Suspect 13	13	-1.84	2.67	96	0.7	94	124	65	63	121	88.7	72.3	86.4	84.3	88.5
Suspect 14	14	-2.47	2.2	96	0.8	94	129	66	60	121	91.2	81.5	86.5	84.3	87.3
Suspect 15	13	-0.23	1.7	98	0.6	92	120	62	63	121	82.6	61.1	88	86.6	89.4
Suspect 16	14	-1.48	3.56	95	0.6	96	136	63	63	124	94.4	84.6	90	83.2	91.5
Suspect 17	13	-2.3	2.79	95	0.7	69	92	119	60	85	104	72.4	73.2	82.1	80.3
Suspect 18	14	-3.38	3.7	93	0.6	70	104	137	58	86	136	78.7	72.1	86.1	84.5
Suspect 19	18	1.35	1.52	100	0.7	70	98	124	72	77	120	91.4	82.7	91.6	82.8
Suspect 20	16	0.82	1.29	100	0.45	84	77	104	61	57	86	87.3	86.7	84.5	86.1
